# Supplementary material
Source: PubMed Central journal article supplement (PMC2664835)

---

**The spontaneous hydrolysis of sucrose and trehalose, and the catalytic proficiencies of invertase and trehalase**Richard Wolfenden and Yang Yuan

---

Supporting Figure 1: Arrhenius plot of rate constants for decomposition of fructose (triangles) and glucose (squares), 0.05 M, in potassium phosphate buffer (0.1 M, pH 8.1)

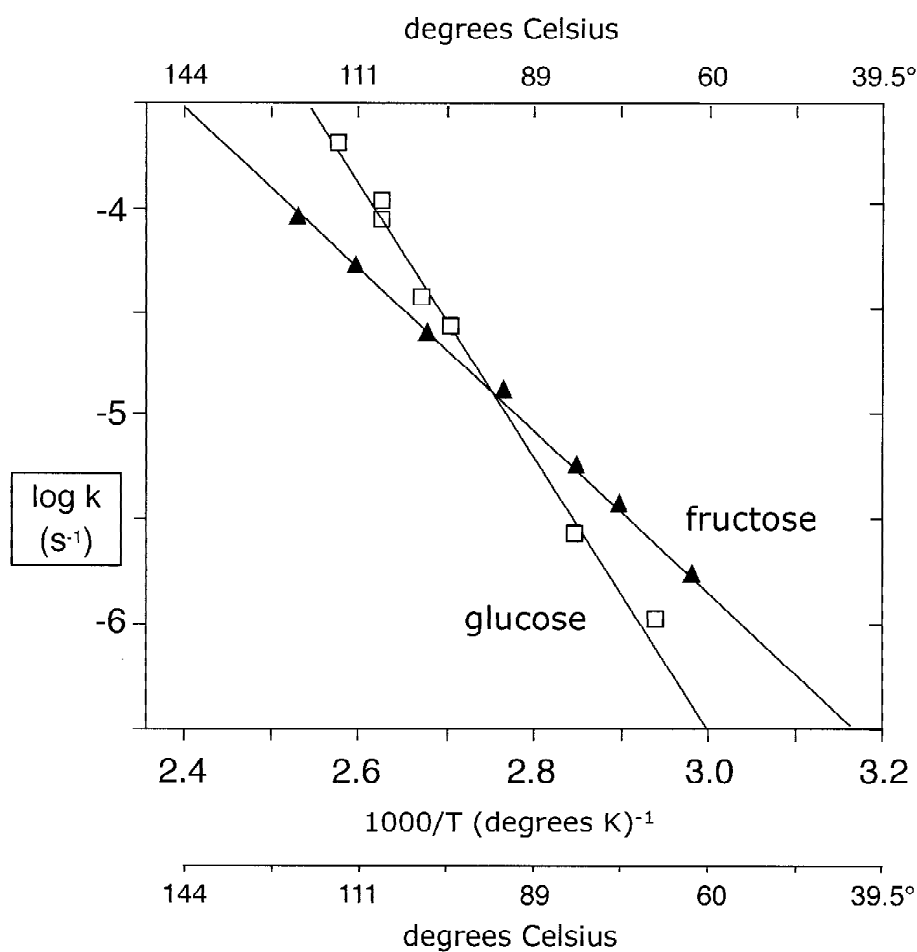

Supporting Figure 2: Rate constants observed for the decomposition of lactose (triangles), cellobiose (squares) and maltose (circles), 0.05 M, in potassium phosphate buffer (0.1 M, pH 8.1), plotted as a logarithmic function of the absolute temperature (Kelvin).

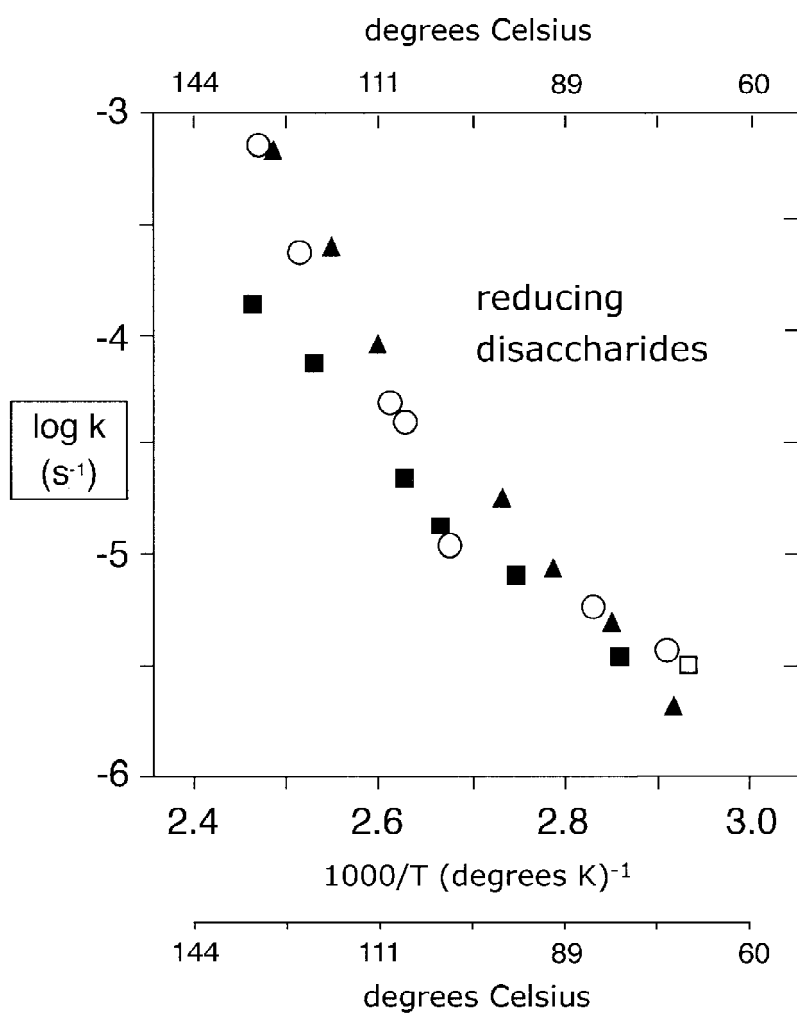

Supplement: ja802206s-File003.pdf [file ja802206s-File003.pdf]
